# Supplementary material for: Characterization and preparation of bio-tubular scaffolds for fabricating artificial vascular grafts by combining electrospinning and a 3D printing system
Source: Royal Society of Chemistry journal article supplement (doi:10.1039/c4cp04801f), 2014-12-19
Supplement: c4cp04801f1.pdf [file c4cp04801f1.pdf]

1 **Characterization and Preparation of 3D Tubular Scaffolds for**  
2 **Fabricating Artificial Vascular by Combining Electrospinning**  
3 **and Rapid Prototyping**  
4

5 Sang Jin Lee,<sup>ab</sup> Dong Nyoung Heo,<sup>b</sup> Ji Sun Park,<sup>a</sup> Seong Keun Kwon,<sup>cde</sup> Jin Ho Lee,<sup>f</sup> Jun Hee  
6 Lee,<sup>a</sup> Wan Doo Kim,<sup>a</sup> Il Keun Kwon,<sup>‡\*b</sup> and Su A Park,<sup>‡\*a</sup>

7  
8 *<sup>a</sup>Department of Nature-Inspired Nanoconvergence Systems, Korea Institute of Machinery  
9 and Materials, 156 Gajeongbuk-ro, Yuseong-gu, Daejeon 304-343, Republic of Korea*

10 *<sup>b</sup>Department of Maxillofacial Biomedical Engineering and Institute of Oral Biology, School  
11 of Dentistry, Kyung Hee University, 26 Kyunghee-daero, Dongdaemun-gu, Seoul 130-701,  
12 Republic of Korea*

13 *<sup>c</sup>Department of Otorhinolaryngology, Head and Neck Surgery, 101 Daehak-ro, Jongno-gu,  
14 Seoul National University Hospital, Seoul 110-744, Republic of Korea*

15 *<sup>d</sup>Cancer Research Institute, Seoul, Republic of Korea*

16 *<sup>e</sup>Seoul National University Medical Research Center, Seoul, Republic of Korea*

17 *<sup>f</sup>Department of Advanced Materials, Hannam University, 461-6 Jeonmin Dong, Yuseong-gu,  
18 Daejeon 305-811, Republic of Korea*

19

20

21

22

23

24

25

26

27

28

29

30

31 † Correspondence to Il Keun Kwon, Ph. D.

32 Department of Maxillofacial Biomedical Engineering and Institute of Oral Biology, School of  
33 Dentistry, Kyung Hee University, 26 Kyunghee-daero, Dongdaemun-gu, Seoul, 130-701,  
34 Republic of Korea

35 Tel.: 82-2-961-0350

36 E-mail address: [kwoni@khu.ac.kr](mailto:kwoni@khu.ac.kr) (Il Keun Kwon).

37

38 † Correspondence to Su A Park, Ph. D.

39 Department of Nature-Inspired Nanoconvergence Systems, Korea Institute of Machinery and  
40 Materials, 156 Gajeongbuk-ro, Yuseong-gu, Daejeon 304-343, Republic of Korea

41 Tel.: 82-42-868-7969

42 E-mail address: [psa@kimm.re.kr](mailto:psa@kimm.re.kr) (Su A. Park).

43

44 † These corresponding authors made equal contributions to this work.

45

## 46 **Electronic Supplementary Information (ESI) For**

### 47 **Experimental: Materials and methods**

#### 48 1. Materials

49 Purified chitosan powder (average MW, 370 kDa; deacetylation degree, 85%) was prepared  
50 as described previously.<sup>1,2</sup> Polycaprolactone (average MW 45 kDa) and trifluoroacetic acid  
51 (RegentPlus<sup>®</sup>, 99%) were purchased from Sigma-Aldrich (St. Louis, MO). Dichloromethane  
52 (Extra Pure, 99.0%+) and N,N-dimethylformamide (grade = 99.5%) were purchased from  
53 Junsei (Junsei Chemical Co., Ltd., Japan). Sodium hydroxide (NaOH) was purchased from  
54 YPC (Yakuri Pure Chemicals Co., Ltd., Japan). Methanol (MeOH) was purchased from  
55 DaeJung (Chemical & Metals Co., Ltd., Korea). Deionized-distilled water (DDW) was  
56 produced with an ultrapure water system (Puris-Ro800; Bio Lab Tech., Korea). All other  
57 reagents and solvents were of analytical grade and used without further purification.

58

#### 59 2. Fabrication of tubular nanofibers via ELSP

60 The fabrication of ENs was performed as our described previously.<sup>1,2</sup> Additionally, ratio of  
61 CTS/PCL volume was fixed as previous report.<sup>3</sup> Detailed conditions are shown in Fig. S1.  
62 Prior to ELSP, CTS and the CTS/PCL blend (8:2) were dissolved in a mixed TFA/MC (7:3)  
63 solvent to produce a 5 wt.% solution. PCL was dissolved in a mixed MC/DMF (9:1) solvent  
64 to produce a 20 wt.% solution. The collector was a rotating mandrel with a diameter of 5 mm.  
65 The resultant materials were dried overnight under vacuum to remove any residual solvent.  
66 After drying, the CTS and CTS/PCL materials were neutralized as described previously<sup>1,2</sup> to  
67 reduce water solubility and to maintain neutral conditions.

68

#### 69 3. Manufacture of novel tubular vessels by rapid prototyping

70 3D-printed PCL strands were fabricated as described previously.<sup>4,5</sup> Briefly, PCL pellets  
71 were melted at 100°C in a heated dispenser. 3D printed strands were extruded in a custom 3D  
72 printing system designed in our laboratory. The nozzle size and distance between strands  
73 were 300 and 1200 μm, respectively. After the PCL was melted, a continuous air pressure of  
74 300 kPa was applied to the dispenser, and strands of molten PCL were applied layer by layer  
75 onto the EN films. The 5-mm drum holding the EN film was rotated between layers to  
76 produce a patterned 0°/45° degree porous structure.

77

#### 78 4. Analytical equipment

79 The molecular structure of EN was characterized using an FT-IR spectrophotometer with a  
80 resolution of 4 cm<sup>-1</sup> between 4000 and 500 cm<sup>-1</sup> (Spectrum™ One System, Perkin-Elmer).

81 Water contact angles were measured using the drop method and a video camera (Phoenix 150,  
82 SEO, Korea). To estimate the amount of water uptake, dried samples were initially weighed  
83 and subsequently immersed in a 10-mL vial containing distilled water. After 1 h of  
84 immersion, the samples were taken out of the water, residual surface water was removed with  
85 a paper wipe, and the samples were weighed again. Water uptake (%) was calculated as  
86 follows:

$$87 \quad \text{Water uptake (\%)} = [(W_{\text{after}} - W_{\text{before}}) / W_{\text{before}}] \times 100.$$

88 The compressive modulus of each sample was determined using a Microload® system (R&B,  
89 Inc., Daejeon, Korea) at a head speed of 0.5 mm/min. The morphology of the EN layer was  
90 observed with a scanning electron microscope (SEM, Hitachi S-4700, Japan) at an  
91 acceleration voltage of 15 kV. All of the samples were sputter-coated with platinum for 10  
92 minutes prior to SEM analysis.

93

94

95 **References**

- 96 1. S. J. Lee, D. N. Heo, J.-H. Moon, W.-K. Ko, J. B. Lee, M. S. Bae, S. W. Park, J. E. Kim, D.  
97 H. Lee and E.-C. Kim, *Carbohydr. Polym.*, 2014, **111**, 530-537.
- 98 2. S. J. Lee, D. N. Heo, J.-H. Moon, H. N. Park, W.-K. Ko, M. S. Bae, J. B. Lee, S. W. Park,  
99 E.-C. Kim and C. H. Lee, *J. Nanosci. Nanotechnol.*, 2014, **14**, 7488-7494.
- 100 3. N. Bhattarai, Z. Li, J. Gunn, M. Leung, A. Cooper, D. Edmondson, O. Veiseh, M. H. Chen,  
101 Y. Zhang and R. G. Ellenbogen, *Advanced Mater.*, 2009, **21**, 2792-2797.
- 102 4. S. A. Park, S. H. Lee and W. D. Kim, *Biopro. Biosis. Eng.*, 2011, **34**, 505-513.
- 103 5. S. A. Park, J. B. Lee, Y. E. Kim, J. E. Kim, J. H. Lee, J.-W. Shin, I. K. Kwon and W. Kim,  
104 *Macromol. Res.*, 2014, **22**, 882-887.

105

106

107

108

109

110

111

112

113

114

115

116

117

118

|                | Weight percent<br>(%) | Voltage<br>(kv) | Distance<br>(cm) | Needle<br>(gauge) | Flow rate<br>(ml/h) | Fiber diameter<br>(nm) |
|----------------|-----------------------|-----------------|------------------|-------------------|---------------------|------------------------|
| (a) CTS EN     | 5                     | 20              | 15               | 22                | 1                   | 441 ± 13               |
| (b) CTS/PCL EN | 5                     | 20              | 15               | 22                | 1                   | 511 ± 25               |
| (c) PCL EN     | 20                    | 18              | 15               | 20                | 1                   | 998 ± 14               |

119 **Figure S1.** The ELSP-fabricated EN characteristics and fiber diameters.

120

121

|                           | 10 sec (%) | 20 sec (%)  | 30 sec (%)  | 40 sec (%)  |
|---------------------------|------------|-------------|-------------|-------------|
| (a) PCL-coated CTS EN     | 127 ± 5.8  | 135.4 ± 9.6 | 140.2 ± 8.6 | 140.2 ± 3.6 |
| (b) PCL-coated CTS/PCL EN | 94.5 ± 3.8 | 108.4 ± 9   | 122.2 ± 8   | 122.2 ± 4.2 |
| (c) PCL-coated PCL EN     | 30.1 ± 6.7 | 30.2 ± 8.4  | 31.3 ± 5.5  | 31.3 ± 2.1  |

122 **Figure S2.** Percent water uptake of the tubular vascular scaffolds.

123

124

|                           | Ultimate tensile strength (MPa) |
|---------------------------|---------------------------------|
| (a) CTS EN                | 1.014 ± 0.19                    |
| (b) CTS/PCL EN            | 3.984 ± 0.14                    |
| (c) PCL-coated CTS EN     | 4.679 ± 0.22                    |
| (d) PCL-coated CTS/PCL EN | 8.266 ± 0.21                    |

125 **Figure S3.** Ultimate tensile strengths of the tubular vascular scaffolds.
